# Supplementary material for: A self-sacrificing strategy to fabricate a fluorine-modified integrated silicon/carbon anode for high-performance lithium-ion batteries
Source: Royal Society of Chemistry journal article supplement (doi:10.1039/d2nj05896k), 2023-01-01
Supplement: d2nj05896k1.pdf [file d2nj05896k1.pdf]

## Supplementary Information

### **Self-sacrificing strategy to fabricate fluorine-modified integrated silicon/carbon anode for high-performance lithium-ion batteries**

Jiangzhi Xiong,<sup>a</sup> Peng Xiao,<sup>\*ab</sup> Jian Luo,<sup>a</sup> Yangjie Li,<sup>a</sup> Peng Zhou,<sup>a</sup> Liang Pang,<sup>a</sup> Xilei Xie<sup>a</sup>  
and Yang Li<sup>ab</sup>

<sup>a</sup> *Powder Metallurgy Research Institute, Central South University, Changsha, 410083, China*

<sup>b</sup> *National Key Laboratory of Science and Technology for National Defence on High-strength Structural Materials, Central South University, Changsha, 410083, China*

\*Corresponding author.

*E-mail address:* xiaopeng@csu.edu.cn (P. Xiao)

## Figure Captions

**Fig. S1** XPS spectra of F-SC: (a) survey scanning spectrum, (b) C 1 s, (c) Si 2 p and (d) F 1 s.

**Fig. S2** O 1s XPS spectra of F-SC

**Fig. S3** SEM and TEM of Si NPs

**Fig. S4** CV curves of SSC at scanning rate of  $0.1 \text{ mV s}^{-1}$  between 0.01 and 1.5 V (vs Li/Li<sup>+</sup>)

**Fig. S5** Comparison of ICE with reported studies in literature

**Fig. S6.** The equivalent circuit diagrams (a) before and (b) after the cycle

**Fig. S7.** Representative lithiation/delithiation voltage profiles of F-SC at  $0.5 \text{ A g}^{-1}$

**Fig. S8.** high magnification surface morphology of F-SC electrode before (a), after 100 cycles (b) and after 200 cycles (c) at  $0.5 \text{ A g}^{-1}$

**Fig. S9.** Microscopic morphology before and after electrode cycling. Surface morphology of SSC electrode before (a) and after 200 cycles (b) at  $0.5 \text{ A g}^{-1}$ . Cross-sectional SEM images of SSC electrode before (c) and after 200 cycles (d) at  $0.5 \text{ A g}^{-1}$ . Variation of electrode thickness

## Table Captions

**Table S1** Atomic percentage of each element in XPS spectra.

**Table S2** Kinetic parameters of Si NPs, F-SC and SSC composites electrodes.

**Table S3** Comparison of performances of Si@void@C composites for lithium-ion batteries.

**Table S1.** Atomic percentage of each element in XPS spectra

|      |       | Binding Energy (eV) | Atomic (%) |
|------|-------|---------------------|------------|
| F-SC | Si 2p | 103~                | 11.07      |
|      | C 1s  | 285~                | 78.54      |
|      | O 1s  | 533~                | 9.71       |
|      | F 1s  | 687~                | 0.68       |
| SSC  | Si 2p | 103~                | 14.51      |
|      | C 1s  | 285~                | 73.22      |
|      | O 1s  | 533~                | 11.82      |
|      | F 1s  | 687~                | 0.45       |

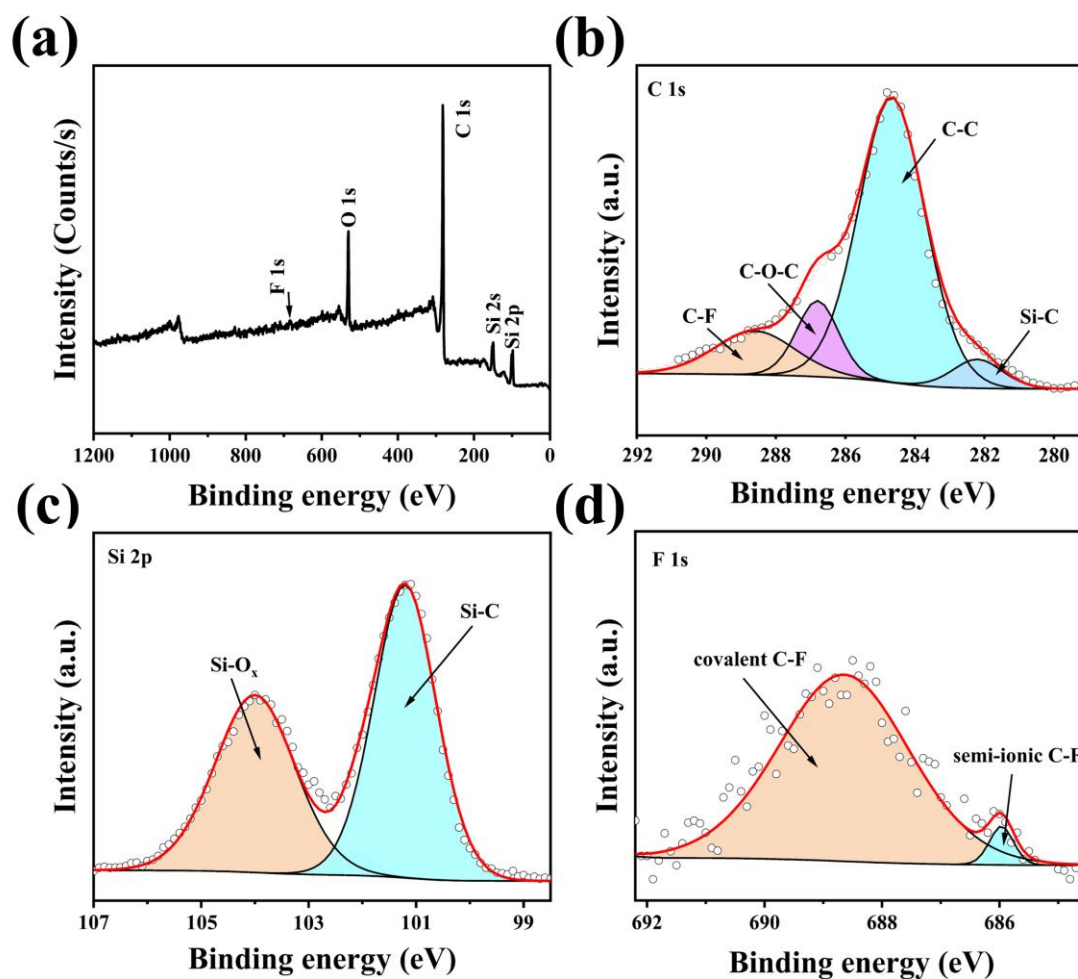

**Fig. S1** XPS spectra of F-SC: (a) survey scanning spectrum, (b) C 1 s, (c) Si 2 p and (d) F 1 s

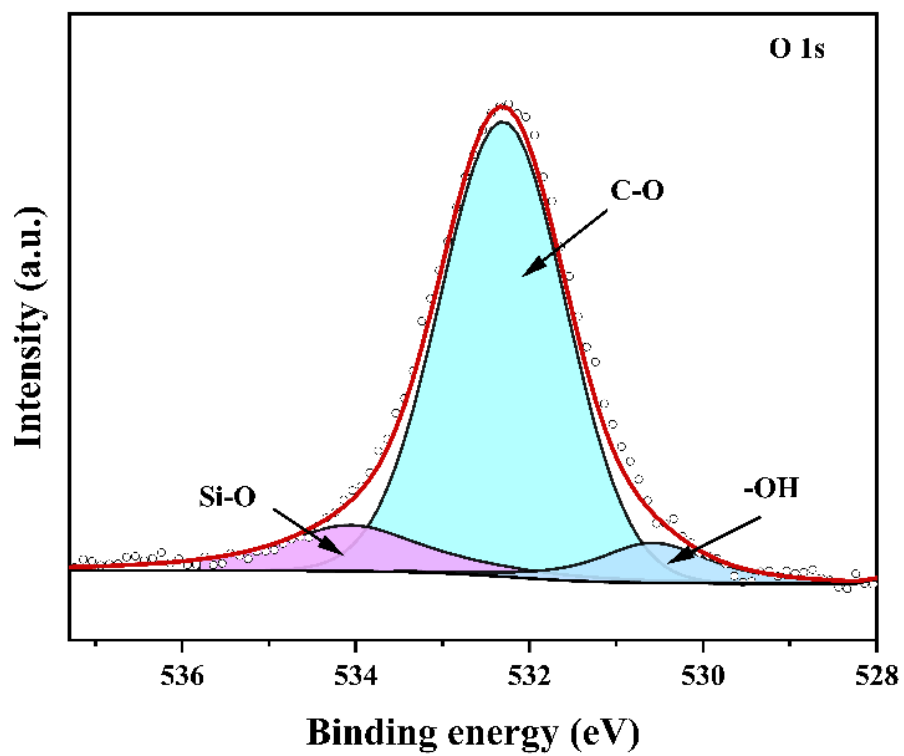

Fig. S2 O 1s XPS spectra of F-SC

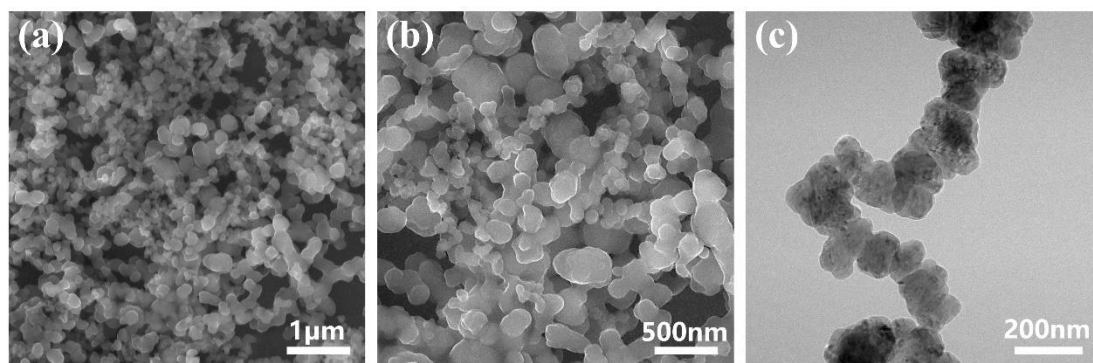

Fig. S3 (a)、(b) SEM and (c) TEM of Si NPs

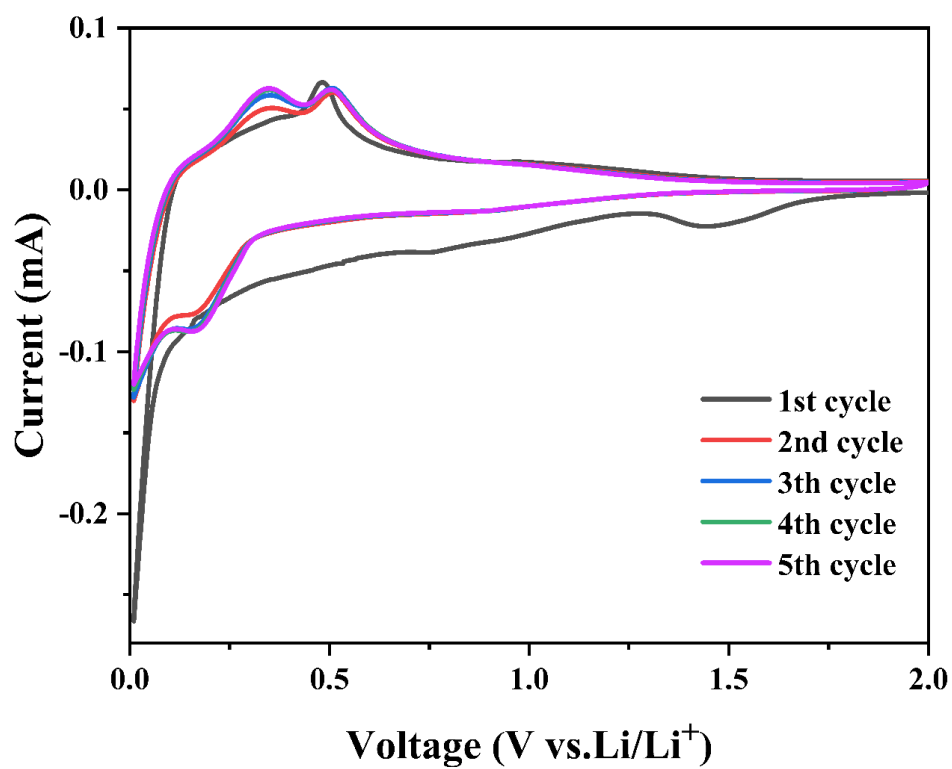

**Fig. S4** CV curves of SSC at scanning rate of  $0.1 \text{ mV s}^{-1}$  between 0.01 and 1.5 V (vs Li/Li<sup>+</sup>)

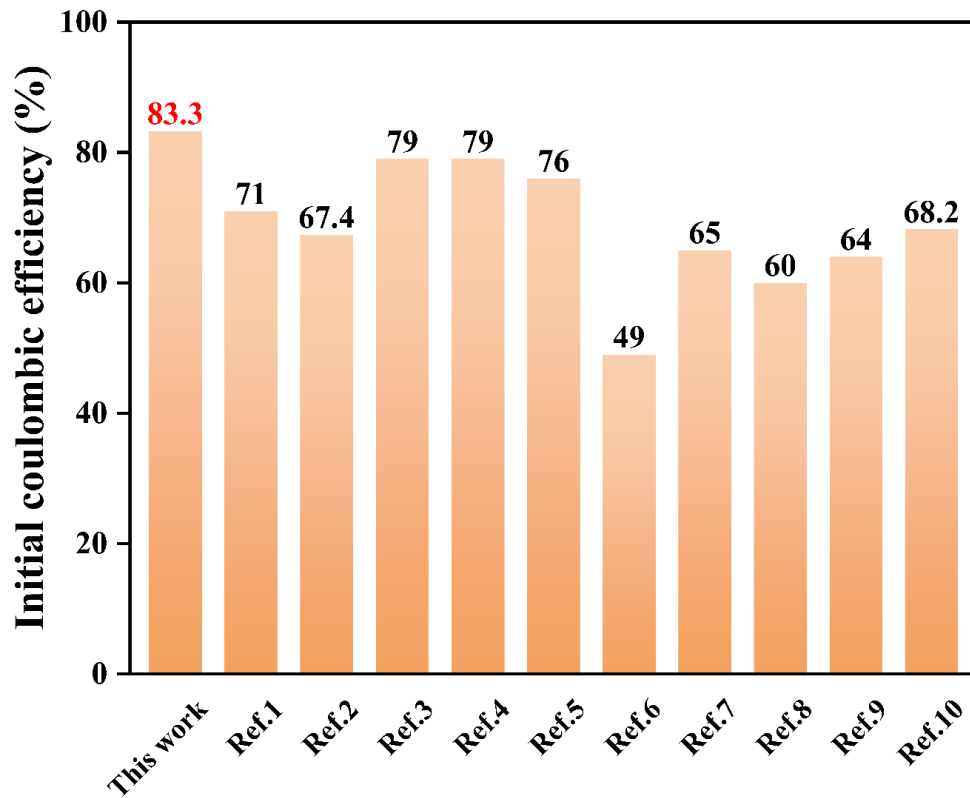

Fig. S5 Comparison of ICE with reported studies in literature<sup>1-10</sup>

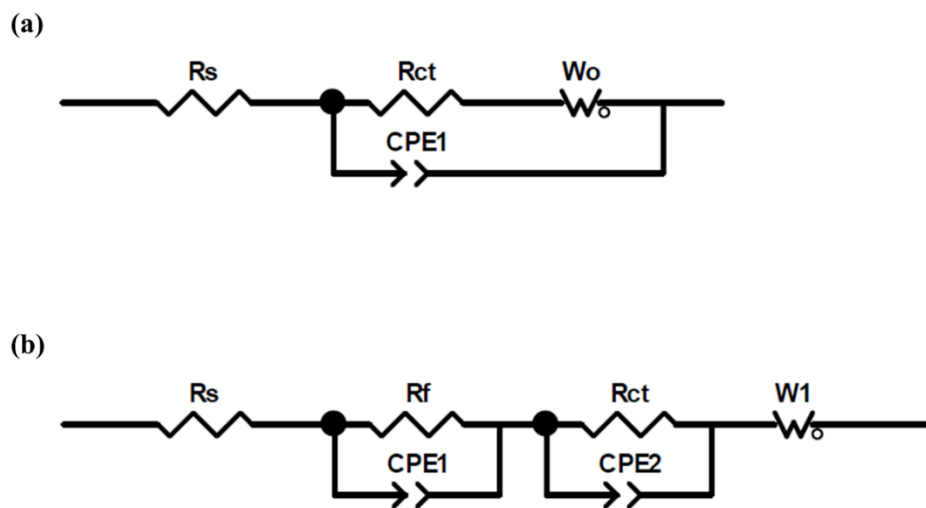

Fig. S6. The equivalent circuit diagrams (a) before and (b) after the cycle

**Table S2.** Kinetic parameters of Si NPs、 F-SC and SSC composites electrodes.

| Materials | Cycle number      | Rs ( $\Omega$ ) | Rf ( $\Omega$ ) | Rct ( $\Omega$ ) |
|-----------|-------------------|-----------------|-----------------|------------------|
| Si NPs    | 0 <sup>th</sup>   | 1.182           | —               | 175.5            |
|           | 100 <sup>th</sup> | 3.454           | 25.98           | 101.8            |
| SSC       | 0 <sup>th</sup>   | 1.255           | —               | 138.3            |
|           | 100 <sup>th</sup> | 6.158           | 41.71           | 46.17            |
| F-SC      | 0 <sup>th</sup>   | 1.225           | —               | 90.42            |
|           | 100 <sup>th</sup> | 1.899           | 68.58           | 39.85            |

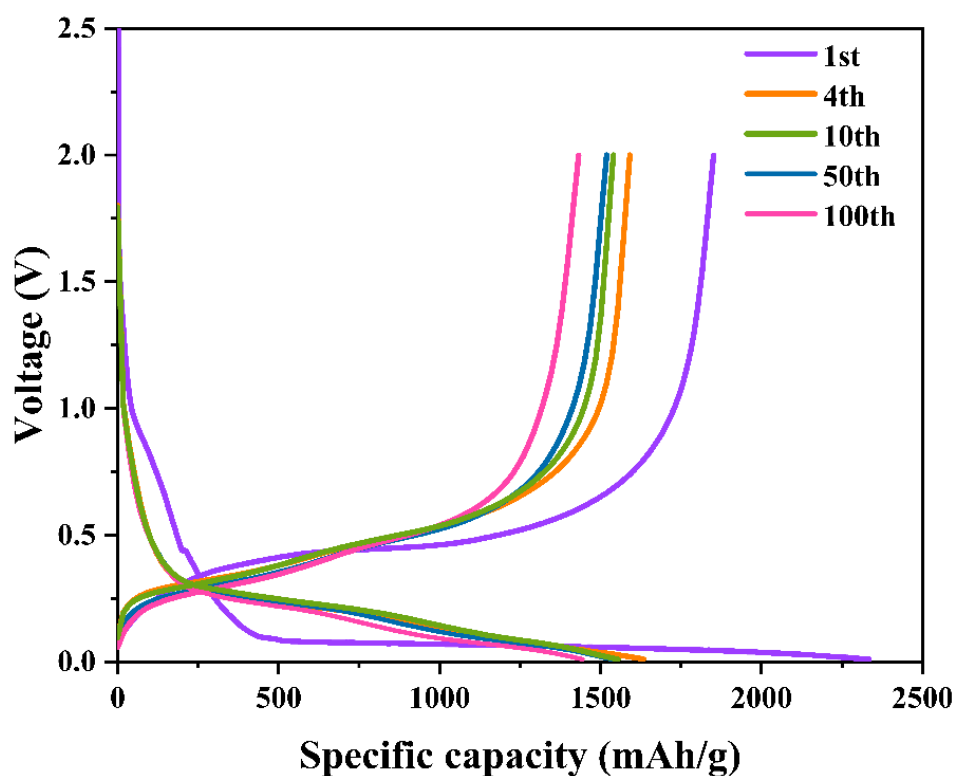**Fig. S7.** Representative lithiation/delithiation voltage profiles of F-SC at 0.5 A g<sup>-1</sup>

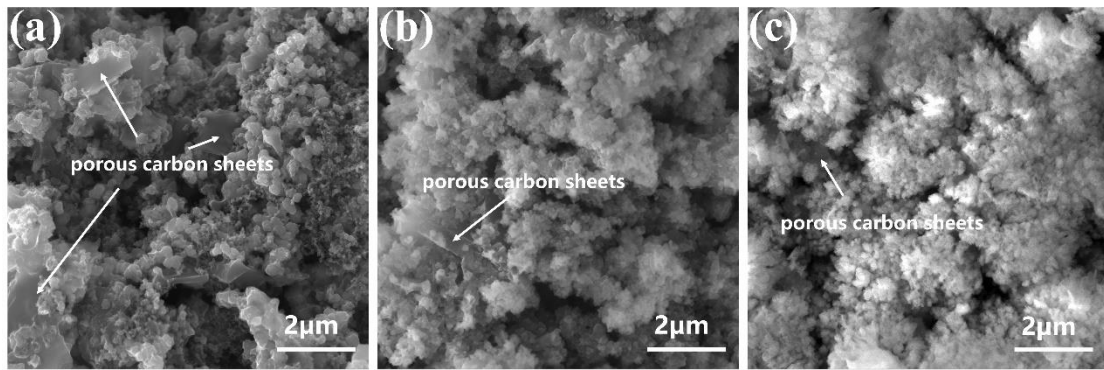

**Fig. S8.** high magnification surface morphology of F-SC electrode before (a), after 100 cycles (b) and after 200 cycles (c) at  $0.5 \text{ A g}^{-1}$

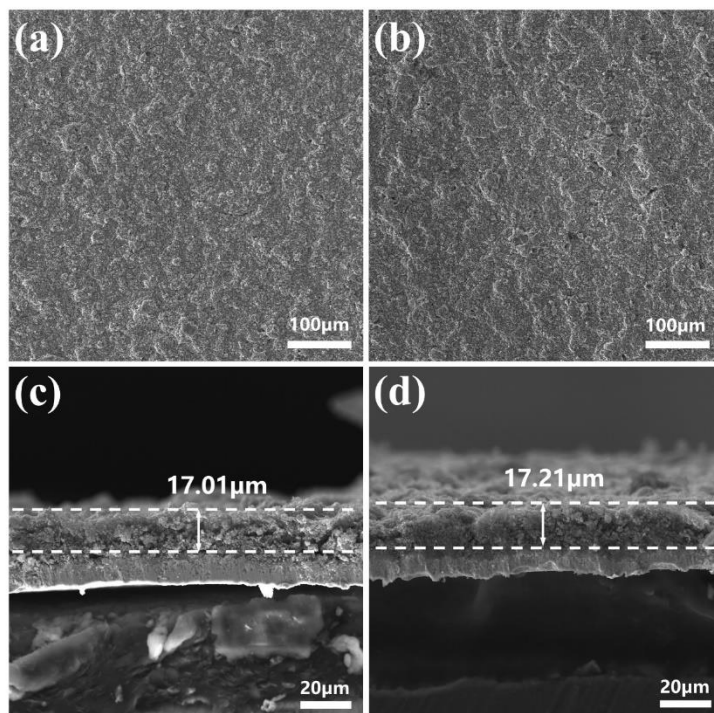

**Fig. S9.** Microscopic morphology before and after electrode cycling. Surface morphology of SSC electrode before (a) and after 200 cycles (b) at  $0.5 \text{ A g}^{-1}$ . Cross-sectional SEM images of SSC electrode before (c) and after 200 cycles (d) at  $0.5 \text{ A g}^{-1}$ .

Variation of electrode thickness



**Table S3.** Comparison of performances of Si@void@C composites for lithium-ion batteries.

| Template         | Etching | Cycle Performance                        |              |                                              |                                  | Ref.      |
|------------------|---------|------------------------------------------|--------------|----------------------------------------------|----------------------------------|-----------|
|                  |         | Current Density<br>(mA·g <sup>-1</sup> ) | Cycle Number | Discharge Capacity<br>(mAh·g <sup>-1</sup> ) | initial coulombic efficiency (%) |           |
| SiO <sub>2</sub> | Yes     | 100                                      | 200          | 1113                                         | 71                               | 1         |
| SiO <sub>2</sub> | Yes     | 500                                      | 500          | 972                                          | 67.4                             | 2         |
| SiO <sub>2</sub> | Yes     | 100                                      | 300          | 705                                          | 79                               | 3         |
| PEI              | No      | 200                                      | 200          | 854                                          | --                               | 11        |
| SiO <sub>2</sub> | Yes     | 200                                      | 300          | 587                                          | 79                               | 4         |
| SiO <sub>2</sub> | Yes     | 100                                      | 100          | 767                                          | --                               | 12        |
| Colloidal        | No      | 100                                      | 200          | 749                                          | 49                               | 6         |
| SiO <sub>2</sub> | Yes     | 1000                                     | 100          | 940                                          | 65                               | 7         |
| PS               | No      | 200                                      | 100          | 710                                          | 60                               | 8         |
| SiO <sub>2</sub> | Yes     | 200                                      | 200          | 1129                                         | 64                               | 9         |
| SiO <sub>2</sub> | Yes     | 1000                                     | 200          | 1020                                         | 68.2                             | 10        |
| CTAB             | No      | 500                                      | 100          | 1444                                         | 83.3                             | This work |
|                  |         | 1000                                     | 400          | 1013                                         |                                  |           |

## References

- 1 L. Hu, B. Luo, C. H. Wu, P. F. Hu, L. Z. Wang and H. J. Zhang, *J. Energy Chem.*, 2019, **32**, 124-130.
- 2 N. T. Liu, J. Liu, D. Z. Jia, Y. D. Huang, J. Luo, X. Mamat, Y. Yu, Y. M. Dong and G. Z. Hu, *Energy Stor. Mater.*, 2019, **18**, 165-173.
- 3 K. Min, K. Kim, H. An, Y. Go, Y. Lee, D. Lim and S.-H. Baeck, *J. Power Sources*, 2022, **543**, 231849.
- 4 Y. He, F. Han, F. Wang, J. Tao, H. Wu, F. Zhang and J. Liu, *Electrochim. Acta*, 2021, **373**, 137924.
- 5 L. Pan, H. Wang, D. Gao, S. Chen, L. Tan and L. Li, *Chem. Commun.*, 2014, **50**, 5878-5880.
- 6 H. Su, A. A. Barragan, L. Geng, D. Long, L. Ling, K. N. Bozhilov, L. Mangolini and J. Guo, *Angew. Chem. Int. Ed. Engl.*, 2017, **56**, 10780-10785.
- 7 W. Li, Z. Li, W. Kang, Y. Tang, Z. Zhang, X. Yang, H. Xue and C.-S. Lee, *J. Mater. Chem. A*, 2014, **2**, 12289-12295.
- 8 X. Huang, X. Sui, H. Yang, R. Ren, Y. Wu, X. Guo and J. Chen, *J. Mater. Chem. A*, 2018, **6**, 2593-2599.
- 9 J. Shao, Y. Yang, X. Zhang, L. Shen and N. Bao, *Materials*, 2021, **14**.
- 10 Y. Lu, P. Chang, L. Wang, J. Nzabanimana and X. Hu, *Funct. Mater. Lett.*, 2019, **12**, 1850094.
- 11 H. Mi, X. Yang, Y. Li, P. Zhang and L. Sun, *Chem. Eng. J.*, 2018, **351**, 103-109.
- 12 H. Tao, L. Z. Fan, W. L. Song, M. Wu, X. He and X. Qu, *Nanoscale*, 2014, **6**, 3138-3142.
